# Supplementary material for: Terminal hydridozinc cation
Source: Royal Society of Chemistry journal article supplement (doi:10.1039/c8cc09839e), 2019-01-01
Supplement: c8cc09839e1.pdf [file c8cc09839e1.pdf]

## Terminal Hydrido Zinc Cation

Raju Chammenahalli,<sup>a</sup> Alex P. Andrews,<sup>a</sup> Florian Ritter,<sup>b</sup> Jun Okuda<sup>b</sup> and Ajay Venugopal <sup>\*a</sup>

<sup>a</sup> School of Chemistry, Indian Institute of Science Education and Research Thiruvananthapuram,  
Vithura, Thiruvananthapuram 695551, India.

<sup>b</sup> Institute of Inorganic Chemistry, RWTH Aachen University, Landoltweg 1, 52056 Aachen, Germany.

## Supporting Information

### Contents:

1. Synthetic Methods, Procedures and Characterisation
2. Crystallographic Data

## 1. Synthetic Methods, Procedures and Characterisation

General Methods: All manipulations were performed under argon atmosphere using standard Schlenk and glove-box techniques.<sup>[1]</sup> The starting materials, Me<sub>6</sub>tren <sup>[3]</sup> and [Et<sub>3</sub>NH][B{C<sub>6</sub>H<sub>3</sub>-3,5-(CF<sub>3</sub>)<sub>2</sub>}]<sub>4</sub> <sup>[4]</sup> were prepared according to the literature procedures, Et<sub>2</sub>Zn was procured from Sigma Aldrich and used as received. (C<sub>6</sub>H<sub>5</sub>)<sub>2</sub>CO was procured from Sigma Aldrich and dried under vacuum (10<sup>-3</sup> mbar) at room temperature for 24 h. *N,N'*-Diisopropylcarbodiimide (DIC) was procured from Sigma Aldrich, distilled under vacuum (10<sup>-3</sup> mbar) at 60 °C and used after drying on molecular sieves (3 Å) for one day. The solvents used for the synthesis and NMR experiments were dried, distilled and degassed prior to use by standard methods.<sup>[2]</sup> NMR measurements were performed on Bruker 500 MHz spectrometer. The chemical shifts (δ ppm) in <sup>1</sup>H and <sup>13</sup>C NMR spectra were referenced to the residual proton signals of the deuterated solvents. <sup>19</sup>F & <sup>11</sup>B NMR spectra were referenced to CFCl<sub>3</sub> and NaBH<sub>4</sub> in D<sub>2</sub>O respectively. Analytically pure compounds for elemental analysis were obtained by repeated crystallisation of the products. Elemental analyses were performed on Elemental Vario Micro Cube.

### Compound 1

[Et<sub>3</sub>NH][B{C<sub>6</sub>H<sub>3</sub>-3,5-(CF<sub>3</sub>)<sub>2</sub>}]<sub>4</sub> (0.375 mmol, 0.362 g) was added to a diethyl ether solution of Me<sub>6</sub>tren (0.375 mmol, 0.100 mL). The reaction mixture was stirred for 2 min. 1 M solution of Et<sub>2</sub>Zn in heptane (0.375 mmol, 0.375 mL) was slowly added to the reaction mixture using a syringe at room temperature then stirred for 1 min. All the volatiles were evaporated under vacuum (10<sup>-3</sup> mbar) at room temperature to get a colourless powder of **1**, which was further purified by crystallisation using THF and *n*-pentane. Yield 0.410 g (93%); elemental analysis for C<sub>46</sub>H<sub>47</sub>BF<sub>24</sub>N<sub>4</sub>Zn: C, 46.50; H, 3.99; N, 4.72; Found: C, 46.48; H, 3.89; N, 4.60; <sup>1</sup>H NMR (CD<sub>2</sub>Cl<sub>2</sub>, 500 MHz): δ 0.22 (q, 2H, <sup>3</sup>J<sub>H-H</sub> = 10 Hz, CH<sub>2</sub>Me<sub>3</sub>), 1.28 (t, 3H, <sup>3</sup>J<sub>H-H</sub> = 10 Hz, CCH<sub>3</sub>), 2.42 (s, 18H, NCH<sub>3</sub>), 2.68 (t, 6H, <sup>3</sup>J<sub>H-H</sub> = 5 Hz, NCH<sub>2</sub>), 2.89 (t, 6H, <sup>3</sup>J<sub>H-H</sub> = 5 Hz, NCH<sub>2</sub>), 7.57 (s, 4H, *p*-C<sub>6</sub>H<sub>3</sub>) 7.79 (br, 8H, *o*-C<sub>6</sub>H<sub>3</sub>) (Figure S1); <sup>13</sup>C{<sup>1</sup>H} NMR (CD<sub>2</sub>Cl<sub>2</sub>, 126 MHz): δ -1.7 (CH<sub>2</sub>Me), 13.9 (CCH<sub>3</sub>), 46.7 (NCH<sub>3</sub>), 52.1 (NCH<sub>2</sub>), 56.5 (NCH<sub>2</sub>), 118.0 (t, *p*-C), 128.4 (q, CF<sub>3</sub>) 129.3 (m, *m*-C), 135.4 (s, *o*-C), 162.5 (q, *i*-C) (Figure S2); <sup>11</sup>B NMR (CD<sub>2</sub>Cl<sub>2</sub>, 128 MHz): δ -6.48 (Figure S3); <sup>19</sup>F NMR (CD<sub>2</sub>Cl<sub>2</sub>, 471 MHz): δ -62.80 (Figure S4).

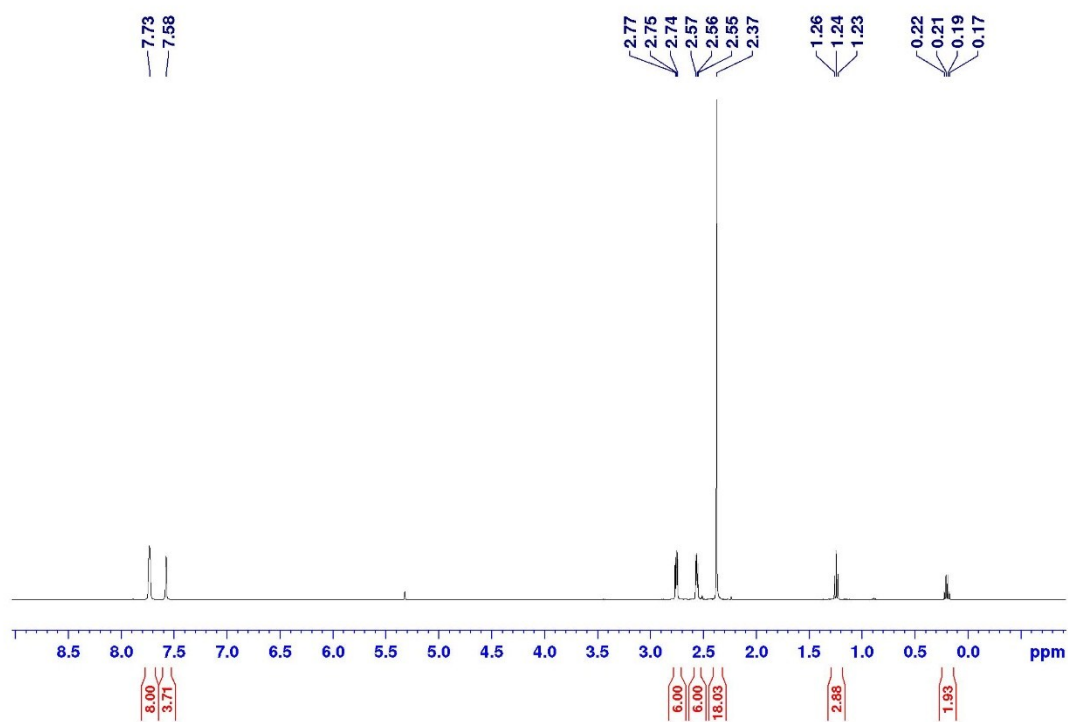

**Figure S1.** <sup>1</sup>H NMR spectrum of **1** recorded in CD<sub>2</sub>Cl<sub>2</sub>.

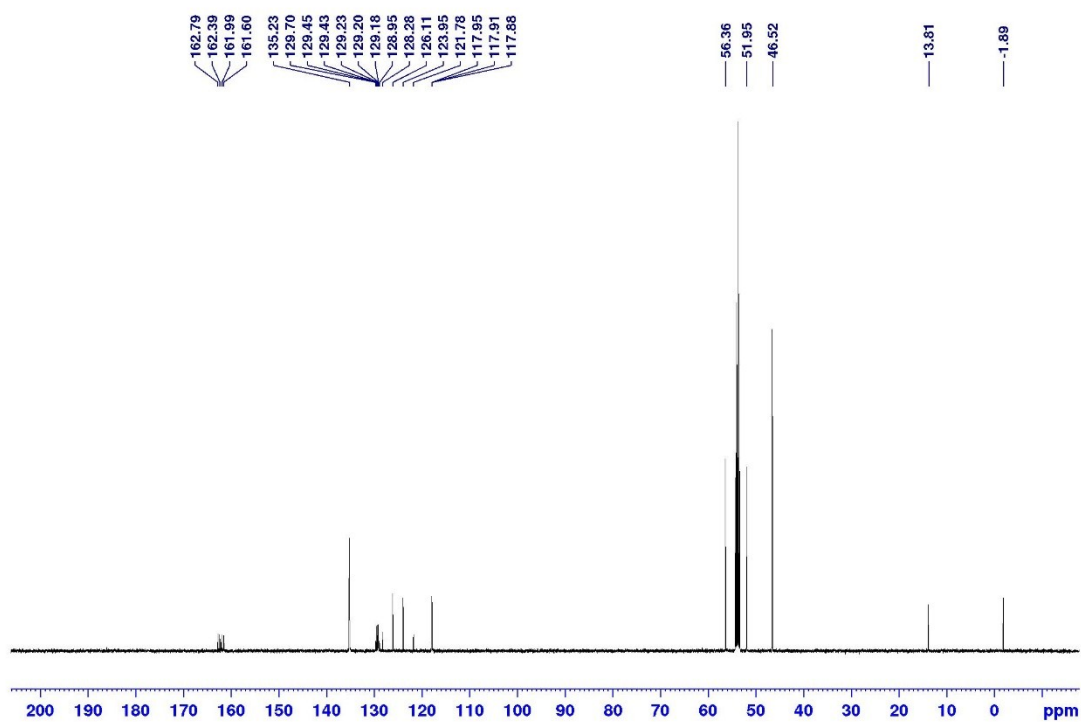

**Figure S2.** <sup>13</sup>C NMR spectrum of **1** recorded in CD<sub>2</sub>Cl<sub>2</sub>.

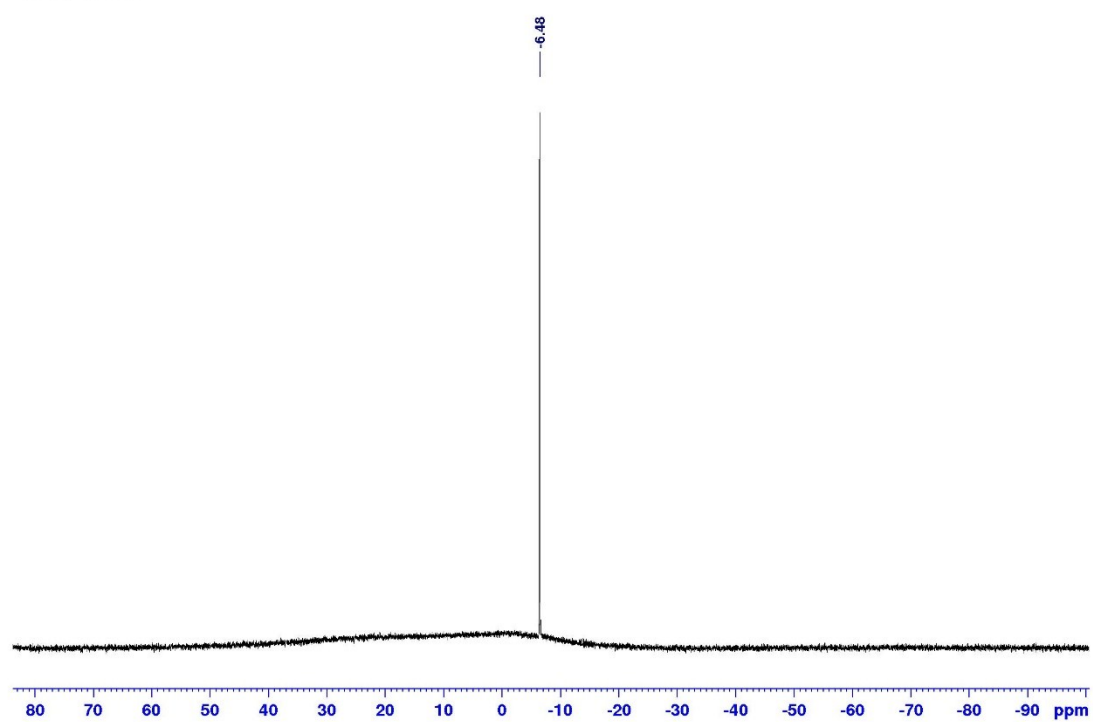

**Figure S3.**  $^{11}\text{B}$  NMR spectrum of **1** recorded in  $\text{CD}_2\text{Cl}_2$ .

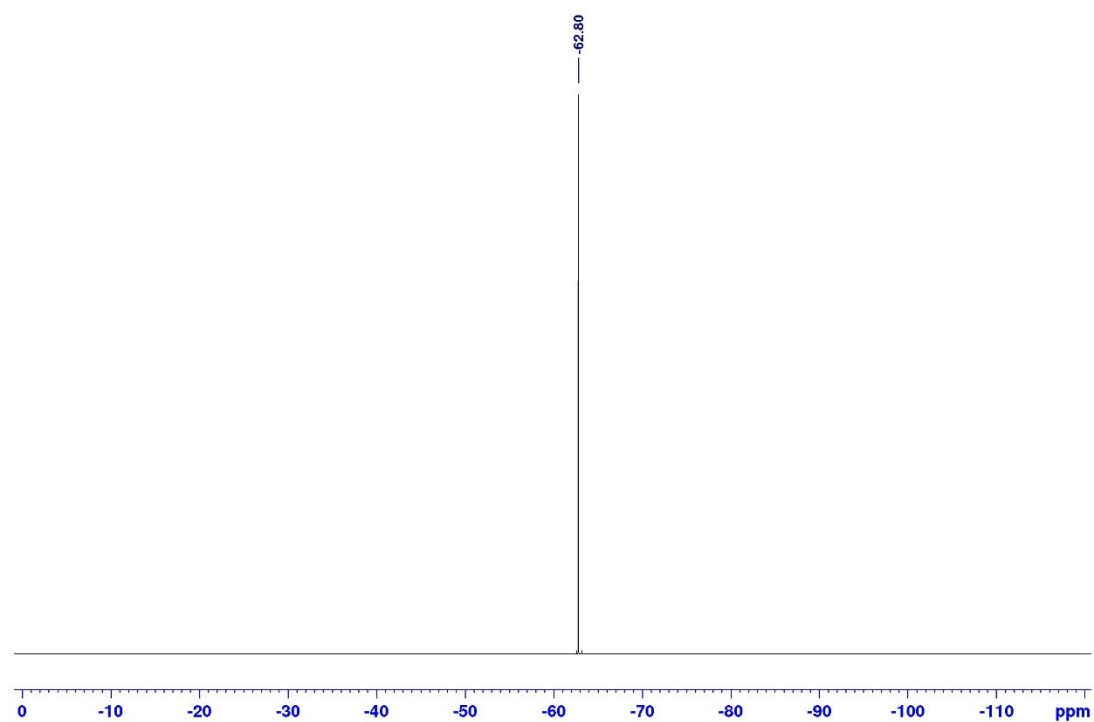

**Figure S4.**  $^{19}\text{F}$  NMR spectrum of **1** recorded in  $\text{CD}_2\text{Cl}_2$ .

**$[(\text{Me}_6\text{tren})\text{ZnOSiPh}_3][\text{B}\{\text{C}_6\text{H}_3(\text{CF}_3)_2\}_4]$**

Compound **1** in 2 mL of diethylether (0.084 mmol, 0.100 g) was added to a solution of  $\text{Ph}_3\text{SiOH}$  in 2 mL diethylether (0.084 mmol, 0.023 g). The reaction mixture was allowed to stir at room temperature for 24 h. All the volatiles were evaporated under vacuum ( $10^{-3}$  mbar) at room temperature to get a colourless powder of  $[(\text{Me}_6\text{tren})\text{ZnOSiPh}_3][\text{B}\{\text{C}_6\text{H}_3(\text{CF}_3)_2\}_4]$ . Compound was further purified by crystallising at  $-30^\circ\text{C}$  in diethylether upon *n*-hexane layering. Yield: 0.110 g (91%); elemental analysis for  $\text{C}_{62}\text{H}_{57}\text{BF}_{24}\text{N}_4\text{OSiZn}$ : C, 51.92; H, 4.01; N, 3.91; found: C, 51.34; H, 3.98; N, 3.87;  $^1\text{H}$  NMR ( $\text{CD}_2\text{Cl}_2$ , 500 MHz):  $\delta$  2.38 (s, 18H,  $\text{NCH}_3$ ), 2.56 (t, 6H,  $^3J_{\text{H-H}} = 5$  Hz,  $\text{NCH}_2$ ), 2.72 (t, 6H,  $^3J_{\text{H-H}} = 5$  Hz,  $\text{NCH}_2$ ), 7.35 (m, 9H, *p*-, *m*- $\text{C}_6\text{H}_5$ ), 7.55 (s, 4H, *p*- $\text{C}_6\text{H}_3$ ), 7.57 (d, 6H,  $^3J_{\text{H-H}} = 5$  Hz, *o*- $\text{C}_6\text{H}_5$ ), 7.72 (br, 8H, *o*- $\text{C}_6\text{H}_3$ ) (Figure S5);  $^{13}\text{C}\{^1\text{H}\}$  NMR ( $\text{CD}_2\text{Cl}_2$ , 126 MHz):  $\delta$  47.1 ( $\text{NCH}_3$ ), 49.9 ( $\text{NCH}_2$ ), 56.4 ( $\text{NCH}_2$ ), 117.9 (t, *p*-C), 126.1 (q,  $\text{CF}_3$ ), 129.3 (m, *m*-C), 135.2 (s, *o*-C), 162.2 (q, *i*-C), 128.0 (s, *p*-SiPh), 129.5 (s, *m*-SiPh), 135.5 (s, *o*-SiPh), 141.4 (s, *i*-SiPh) (Figure S6);  $^{11}\text{B}$  NMR ( $\text{CD}_2\text{Cl}_2$ , 128 MHz):  $\delta$  -6.56 (Figure S7);  $^{19}\text{F}$  NMR ( $\text{CD}_2\text{Cl}_2$ , 471 MHz):  $\delta$  -62.80 (Figure S8).

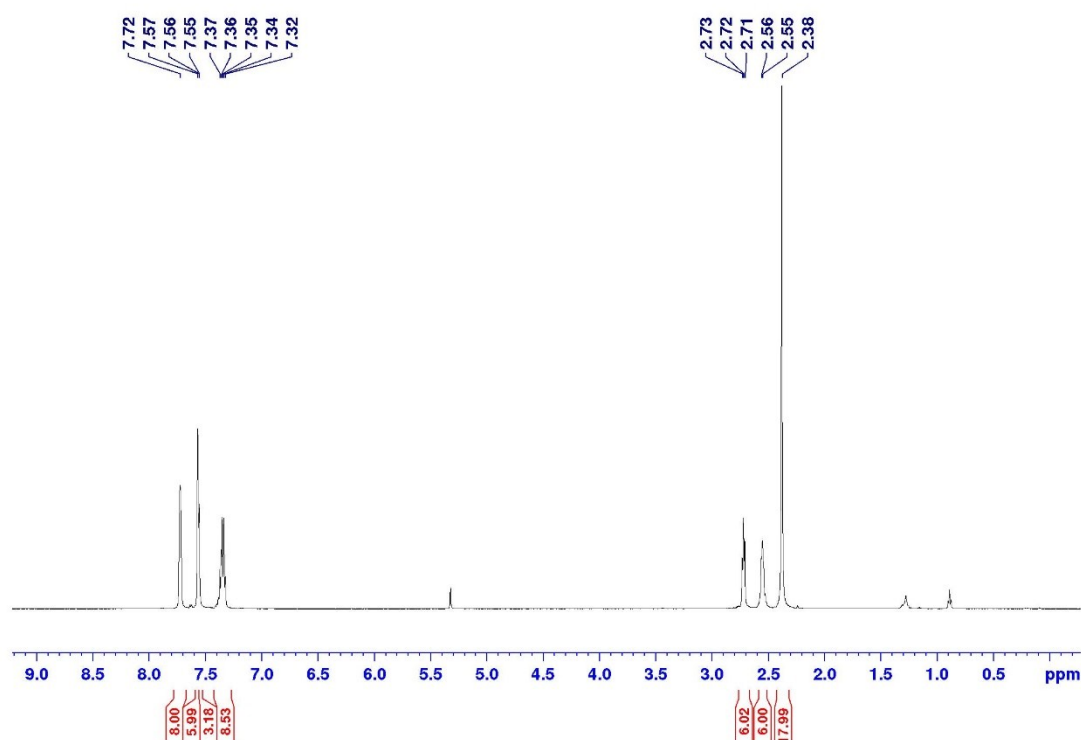

**Figure S5.**  $^1\text{H}$  NMR spectrum of  $[(\text{Me}_6\text{tren})\text{ZnOSiPh}_3][\text{B}\{\text{C}_6\text{H}_3(\text{CF}_3)_2\}_4]$  recorded in  $\text{CD}_2\text{Cl}_2$ .

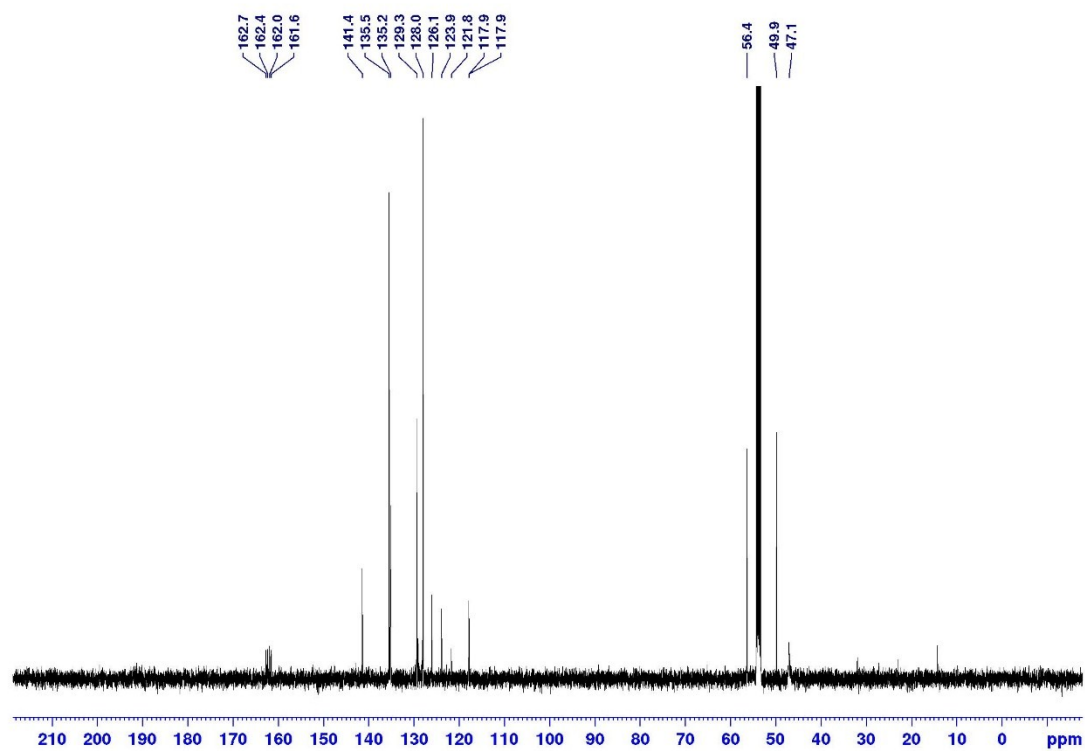

**Figure S6.**  $^{13}\text{C}$  NMR spectrum of  $[(\text{Me}_6\text{tren})\text{ZnOSiPh}_3][\text{B}\{\text{C}_6\text{H}_3(\text{CF}_3)_2\}_4]$  recorded in  $\text{CD}_2\text{Cl}_2$ .

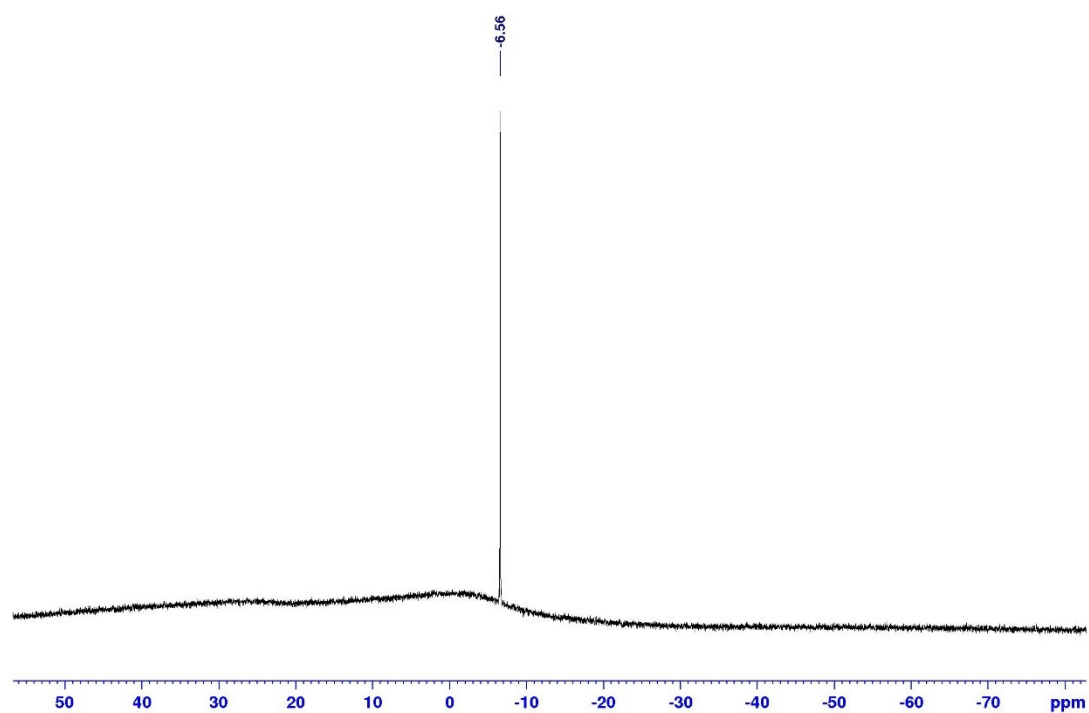

**Figure S7.**  $^{11}\text{B}$  NMR spectrum of  $[(\text{Me}_6\text{tren})\text{ZnOSiPh}_3][\text{B}\{\text{C}_6\text{H}_3(\text{CF}_3)_2\}_4]$  recorded in  $\text{CD}_2\text{Cl}_2$ .

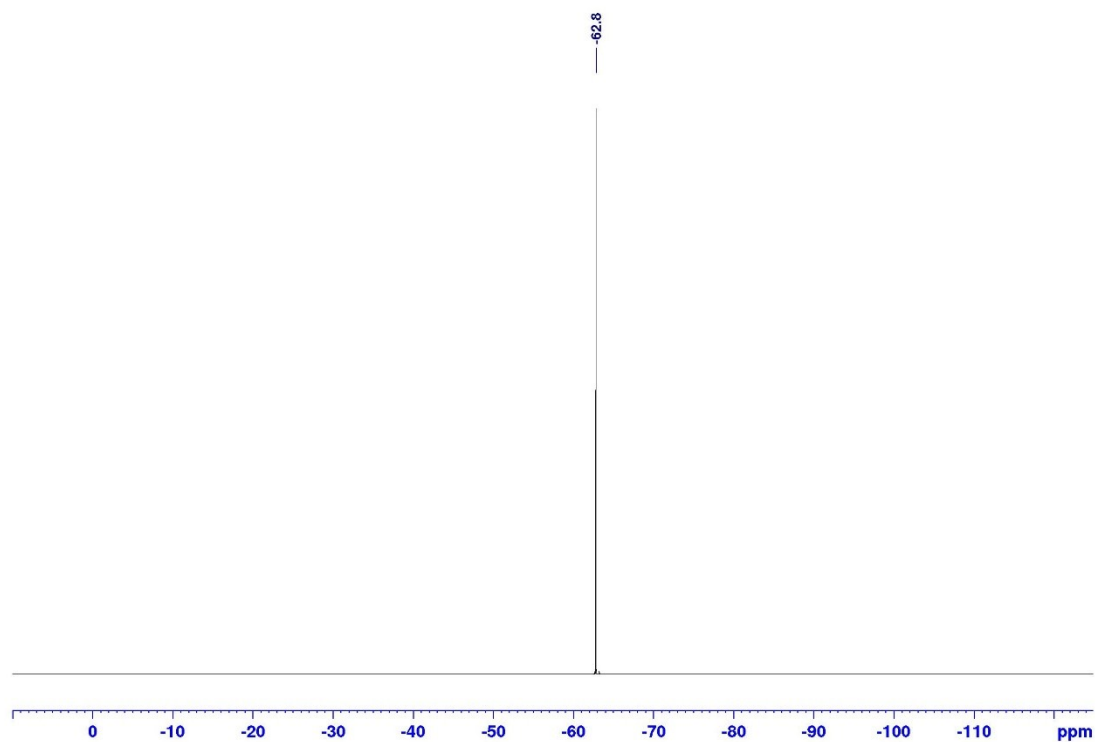

**Figure S8.**  $^{19}\text{F}$  NMR spectrum of  $[(\text{Me}_6\text{tren})\text{ZnOSiPh}_3][\text{B}\{\text{C}_6\text{H}_3(\text{CF}_3)_2\}_4]$  recorded in  $\text{CD}_2\text{Cl}_2$ .

## Compound 2

Method A:  $[(\text{Me}_6\text{tren})\text{ZnOSiPh}_3][\text{B}\{\text{C}_6\text{H}_3(\text{CF}_3)_2\}_4]$  (0.069 mmol, 0.100 g) was dissolved in THF (2 mL).  $\text{PhSiH}_3$  (0.140 mmol, 0.017 mL) was added to this solution. The reaction mixture was heated at 50 °C and stirred under argon for 6 h. A small amount of black precipitate was formed at the end of reaction which was filtered. The volatiles were dried under vacuum ( $10^{-3}$  mbar). The obtained residue was washed twice with *n*-hexane and dried to get a colourless powder of **2**. The compound was crystallised in THF upon layering with *n*-hexane. Yield: 0.075 g (93%); elemental analysis for  $\text{C}_{44}\text{H}_{43}\text{BF}_{24}\text{N}_4\text{Zn}$ : C, 45.56; H, 3.74; N, 4.83; found: C, 45.3; H, 3.73 N, 4.81;  $^1\text{H}$  NMR (THF-D<sub>8</sub>, 500 MHz):  $\delta$  2.36 (s, 18H,  $\text{NCH}_3$ ), 2.71 (t, 6H,  $^3J_{\text{H-H}} = 5$  Hz,  $\text{NCH}_2$ ), 2.84 (t, 6H,  $^3J_{\text{H-H}} = 5$  Hz,  $\text{NCH}_2$ ), 3.47 (s, 1H,  $\text{ZnH}$ ), 7.58 (s, 4H, *p*- $\text{C}_6\text{H}_3$ ), 7.79 (br, 8H, *o*- $\text{C}_6\text{H}_3$ ) (Figure S9);  $^{13}\text{C}\{^1\text{H}\}$  NMR (THF-D<sub>8</sub>, 126 MHz):  $\delta$  45.9 ( $\text{NCH}_3$ ), 51.4 ( $\text{NCH}_2$ ), 55.5 ( $\text{NCH}_2$ ), 118.2 (t, *p*-C), 128.7 (q,  $\text{CF}_3$ ), 120.2 (m, *m*-C), 135.6 (s, *o*-C), 162.3 (q, *i*-C) (Figure S10);  $^{11}\text{B}$  NMR (THF-D<sub>8</sub>, 128 MHz):  $\delta$  -6.47 (Figure S11);  $^{19}\text{F}$  NMR (THF-D<sub>8</sub>, 471 MHz):  $\delta$  -63.39 (Figure S12).

Method B:  $\text{Me}_6\text{tren}$  (0.800 mmol, 0.200 g) in THF was added to a stirred suspension of freshly prepared  $\text{ZnH}_2$  (1 mmol, 0.070 g) in THF and stirred at ambient temperature for 5 min. Subsequently a THF solution of  $[\text{Et}_3\text{NH}][\text{B}\{\text{C}_6\text{H}_3\text{-}3,5\text{-(CF}_3)_2\}_4]$  (0.800 mmol, 0.772 g) was added dropwise. After evolution of gas ceased, the reaction mixture was filtered and the filtrate was dried under *vacuo* ( $10^{-3}$  mbar) to remove all the volatiles. The obtained residue was washed twice with *n*-pentane and dried to get a colourless powder of **2**. Yield: 0.826 g (89%).

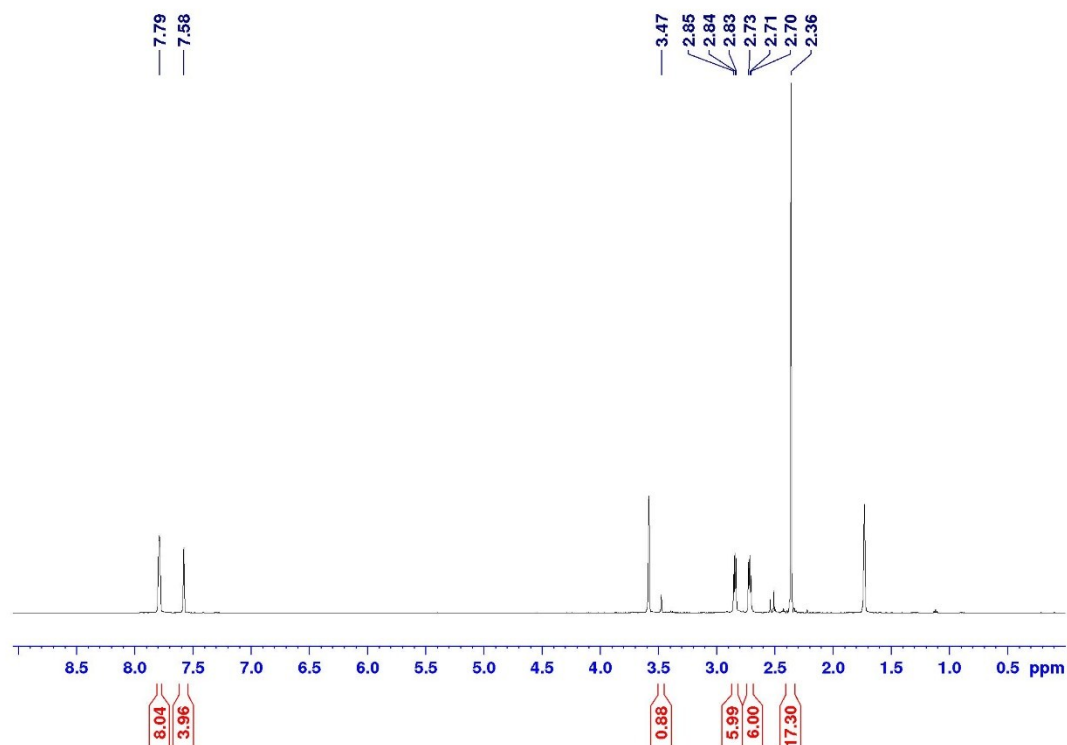

**Figure S9.**  $^1\text{H}$  NMR spectrum of **2** recorded in THF (D<sub>8</sub>).

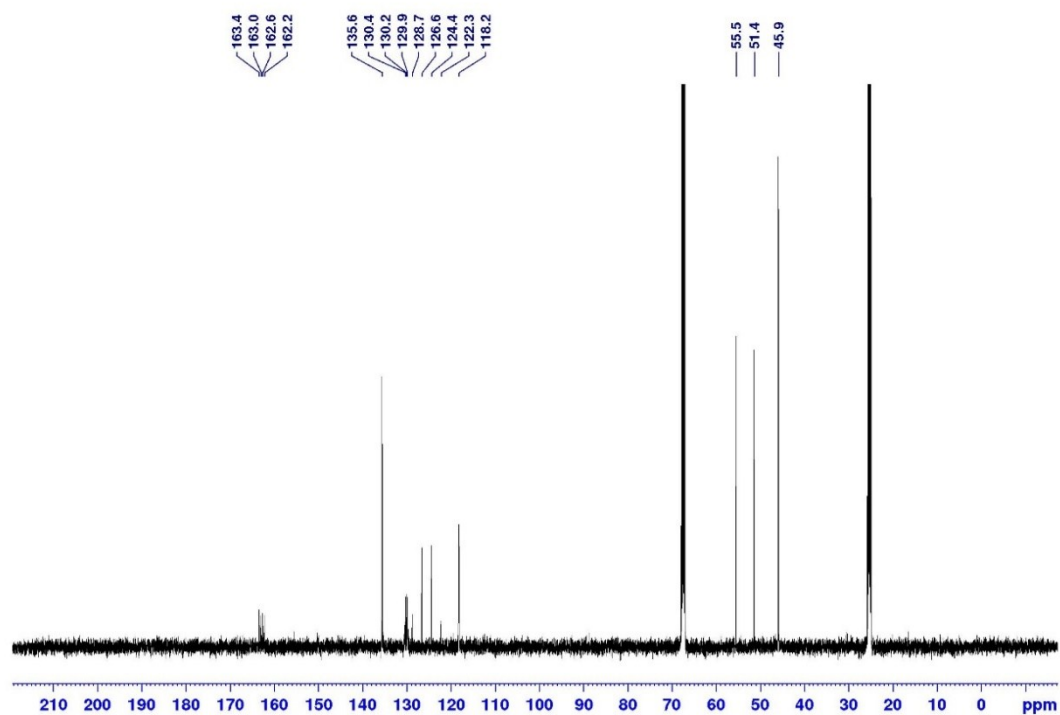

**Figure S10.** <sup>13</sup>C NMR spectrum of **2** recorded in THF (D8).

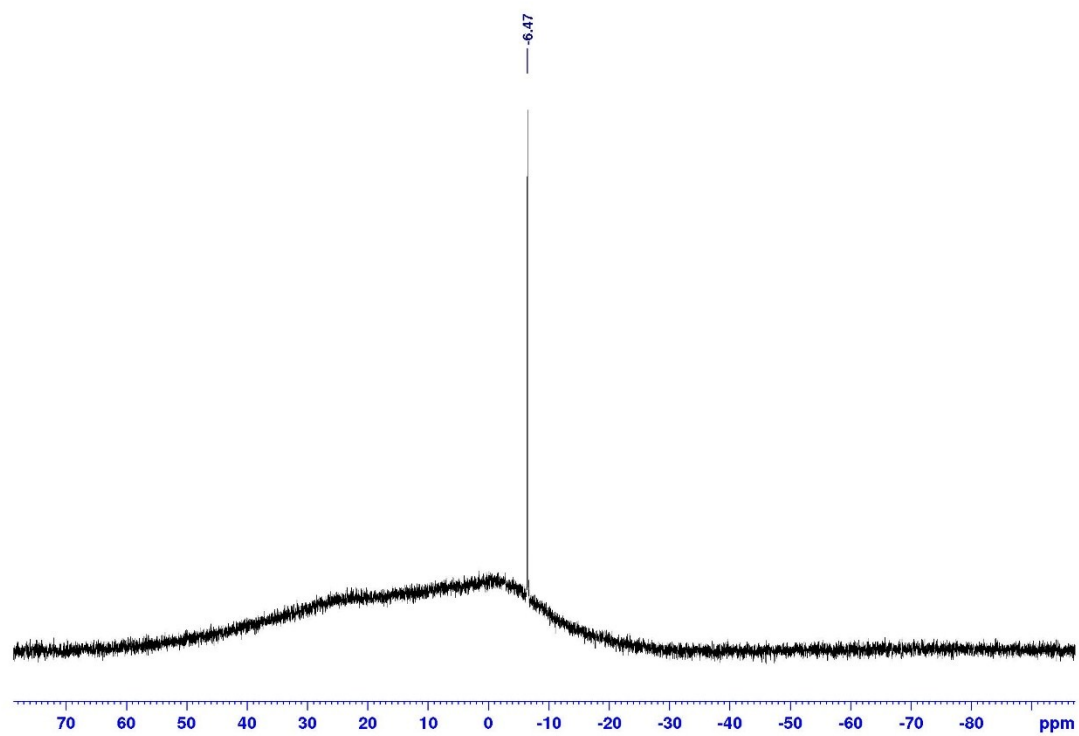

**Figure S11.** <sup>11</sup>B NMR spectrum of **2** recorded in THF (D8).

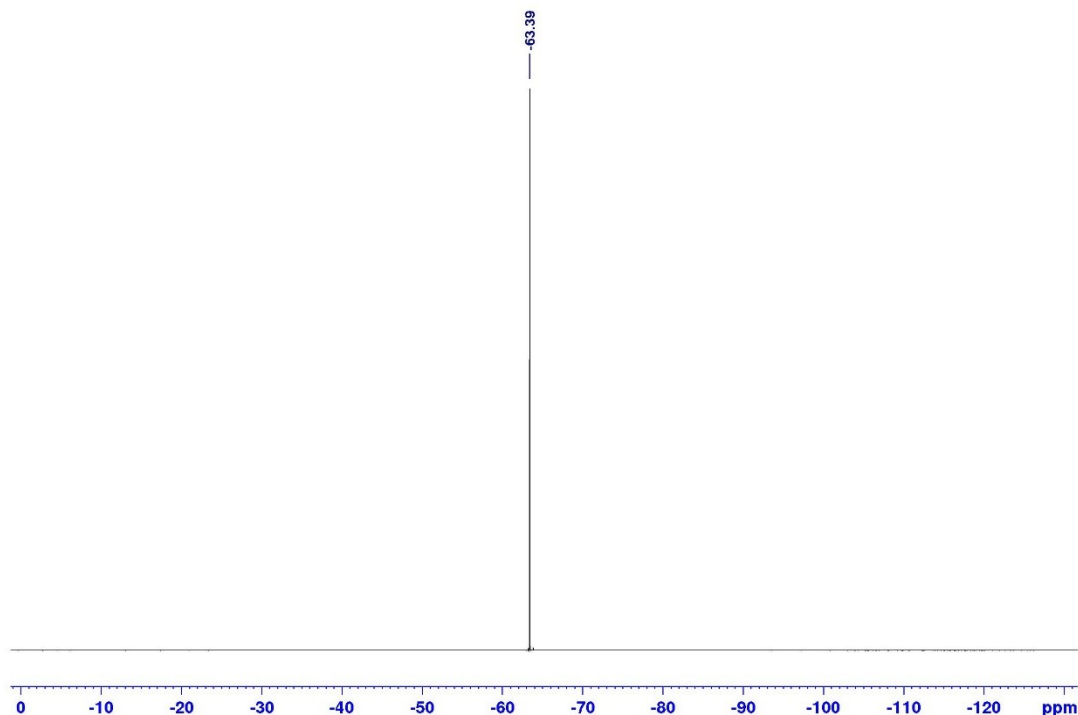

**Figure S12.**  $^{19}\text{F}$  NMR spectrum of **2** recorded in THF (D8).

### Compound 3

**2** (0.086 mmol, 0.100 g) was dissolved in THF (5 mL) and pressurised with  $\text{CO}_2$  (1 bar). The reaction mixture was stirred for 5 minutes. The volatiles were removed under vacuum ( $10^{-2}$  mbar) at room temperature, washed twice with *n*-hexane and dried to get a colourless powder of **3**. The compound was crystallised from diethylether/ *n*-hexane mixture. Yield: 0.098 g (93%); elemental analysis for  $\text{C}_{46}\text{H}_{46}\text{BF}_{24}\text{N}_4\text{O}_2\text{Zn}$ : C, 45.32; H, 3.80; N, 4.60; Found: C, 45.18; H, 3.75; N, 4.50;  $^1\text{H}$  NMR ( $\text{CD}_2\text{Cl}_2$ , 500 MHz):  $\delta$  2.55 (s, 18H,  $\text{NCH}_3$ ), 2.64 (t, 6H,  $^3J_{\text{H-H}} = 5$  Hz,  $\text{NCH}_2$ ), 2.89 (t, 6H,  $^3J_{\text{H-H}} = 5$  Hz,  $\text{NCH}_2$ ), 7.57 (s, 4H, *p*- $\text{C}_6\text{H}_3$ ), 7.79 (br, 8H, *o*- $\text{C}_6\text{H}_3$ ) (Figure S13);  $^{13}\text{C}\{^1\text{H}\}$  NMR ( $\text{CD}_2\text{Cl}_2$ , 126 MHz):  $\delta$  -1.7 ( $\text{CH}_2\text{Me}$ ), 13.9 ( $\text{CCH}_3$ ), 46.7 ( $\text{NCH}_3$ ), 52.1 ( $\text{NCH}_2$ ), 56.5 ( $\text{NCH}_2$ ), 117.9 (t, *p*-C), 126.1 (q,  $\text{CF}_3$ ), 129.2 (m, *m*-C), 135.2 (s, *o*-C), 162.0 (q, *i*-C) 167.7 (s,  $\text{OCHO}$ ), (Figure S14);  $^{11}\text{B}$  NMR ( $\text{CD}_2\text{Cl}_2$ , 128 MHz):  $\delta$  -6.49 (Figure S15);  $^{19}\text{F}$  NMR ( $\text{CD}_2\text{Cl}_2$ , 471 MHz):  $\delta$  -62.80 (Figure S16).

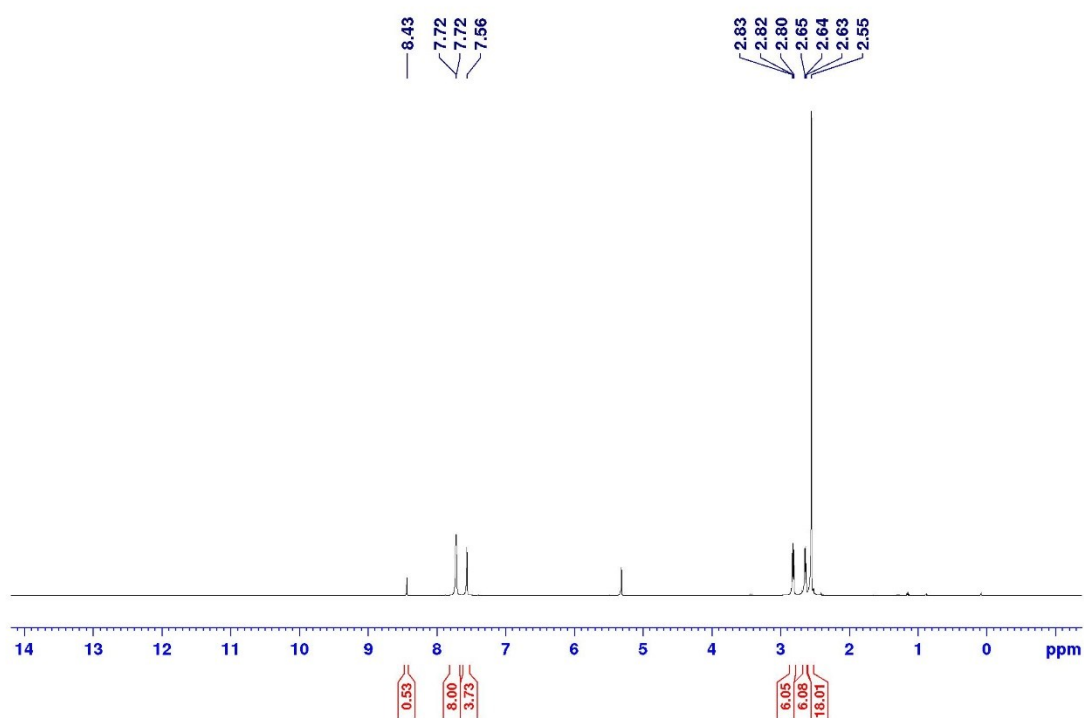

**Figure S13.**  $^1\text{H}$  NMR spectrum of **3** recorded in  $\text{CD}_2\text{Cl}_2$ .

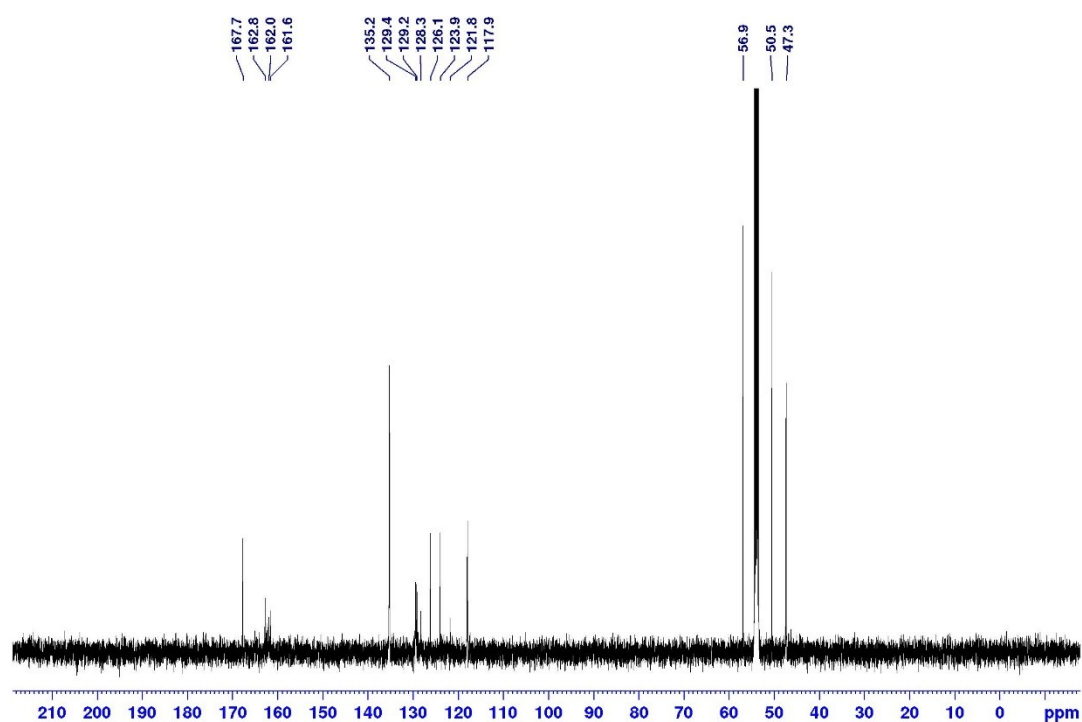

**Figure S14.**  $^{13}\text{C}$  NMR spectrum of **3** recorded in  $\text{CD}_2\text{Cl}_2$ .

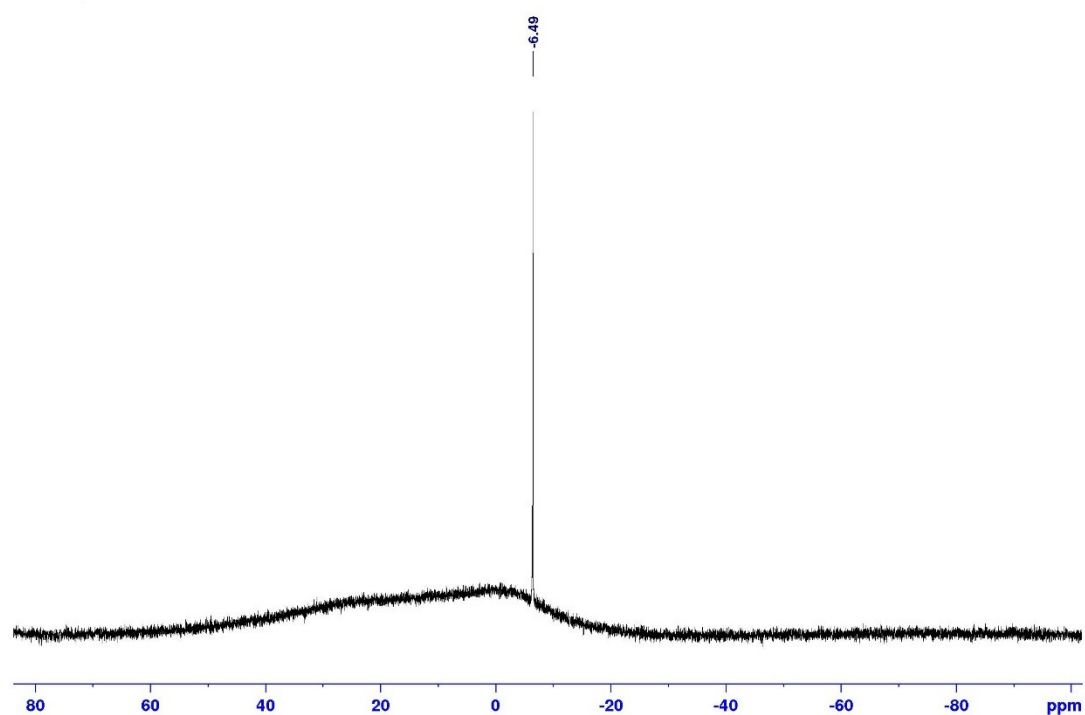

**Figure S15.**  $^{11}\text{B}$  NMR spectrum of **3** recorded in  $\text{CD}_2\text{Cl}_2$ .

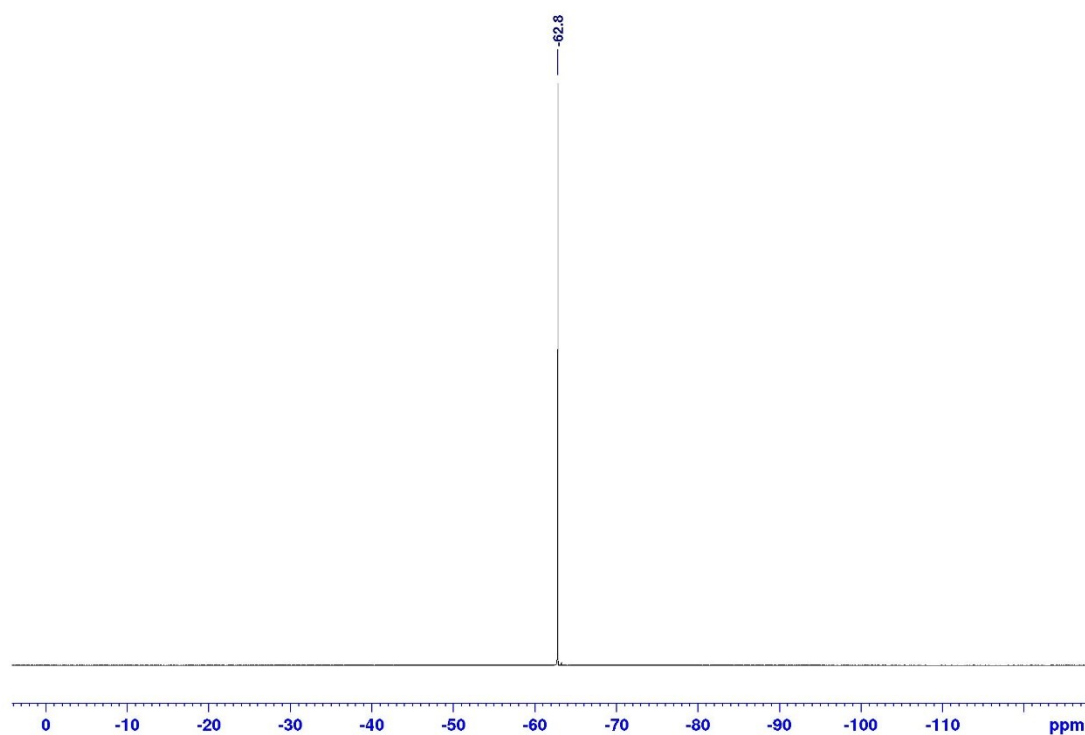

**Figure S16.**  $^{19}\text{F}$  NMR spectrum of **3** recorded in  $\text{CD}_2\text{Cl}_2$ .

#### Compound 4

**2** (0.086 mmol, 0.100 g) was dissolved in THF (5 mL) and treated with N, N'-diisopropylcarbodiimide (0.086 mmol, 0.0134 mL). The reaction mixture was stirred at room temperature and the volatiles were subsequently evaporated under vacuum ( $10^{-3}$  mbar) leaving behind a colourless precipitate, which was washed twice with *n*-hexane and further dried to get a fine white powder of **4**. The compound was crystallised from a mixture of diethylether and *n*-hexane. Yield: 0.103 g (92%); elemental analysis for  $C_{52}H_{60}BF_{24}N_6Zn$ : C, 48.00; H, 4.65; N, 6.46; found: C, 47.71; H, 4.56; N, 6.45;  $^1H$  NMR ( $CD_2Cl_2$ , 500 MHz):  $\delta$  1.10 (d, 12H,  $^3J_{H-H} = 5$  Hz,  $CCH_3$ ), 2.42 (s, 18H,  $NCH_3$ ), 2.66 (t, 6H,  $^3J_{H-H} = 5$  Hz,  $NCH_2$ ), 2.98 (t, 6H,  $^3J_{H-H} = 5$  Hz,  $NCH_2$ ), 3.42 (m, 2H,  $^3J_{H-H} = 5$  Hz,  $NCHMe_2$ ), 7.57 (s, 4H, *p*- $C_6H_3$ ), 7.79 (br, 8H, *o*- $C_6H_3$ ), 7.82 (s, 1H, 7.82) (Figure S17);  $^{13}C\{^1H\}$  NMR ( $CD_2Cl_2$ , 126 MHz):  $\delta$  15.5 ( $NCHMe_2$ ), 26.5 ( $CH(CH_3)_2$ ), 46.5 ( $NCH_3$ ), 50.0 ( $NCH_2$ ), 55.9 ( $NCH_2$ ), 117.9 (t, *p*-C), 125.0 (q,  $CF_3$ ), 129.2 (m, *m*-C), 135.2 (s, *o*-C), 162.4 (q, *i*-C) (Figure S18);  $^{11}B$  NMR ( $CD_2Cl_2$ , 128 MHz):  $\delta$  -6.64 (Figure S19);  $^{19}F$  NMR ( $CD_2Cl_2$ , 471 MHz):  $\delta$  -62.80 (Figure S20).

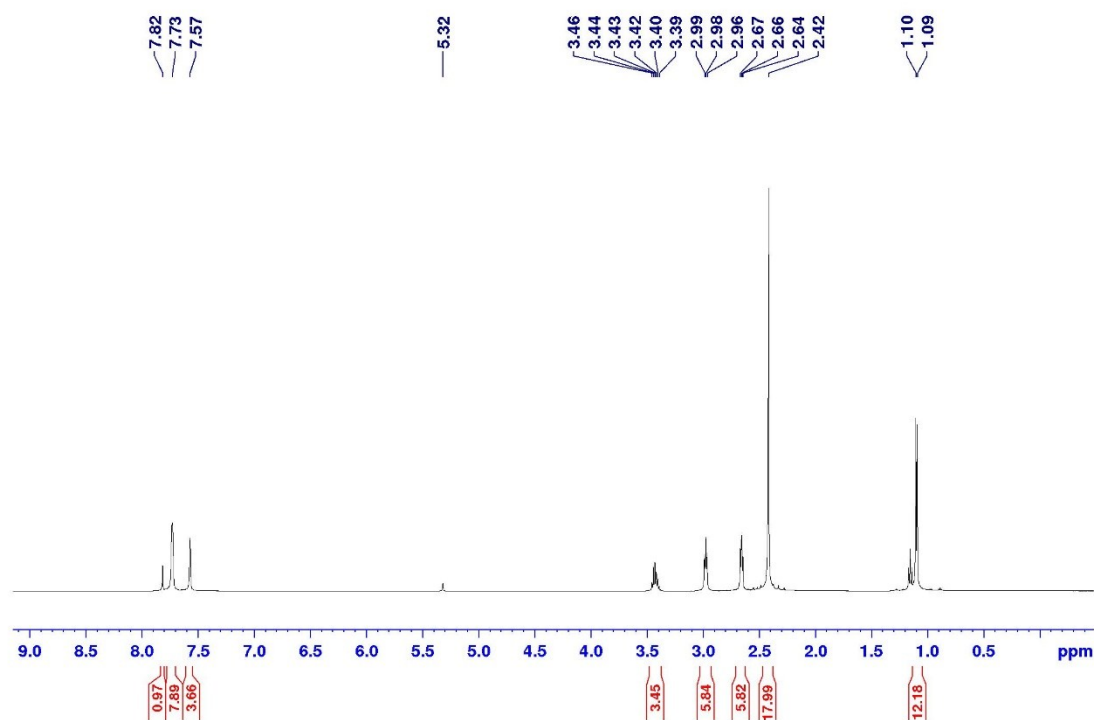

**Figure S17.**  $^1H$  NMR spectrum of **4** recorded in  $CD_2Cl_2$ .

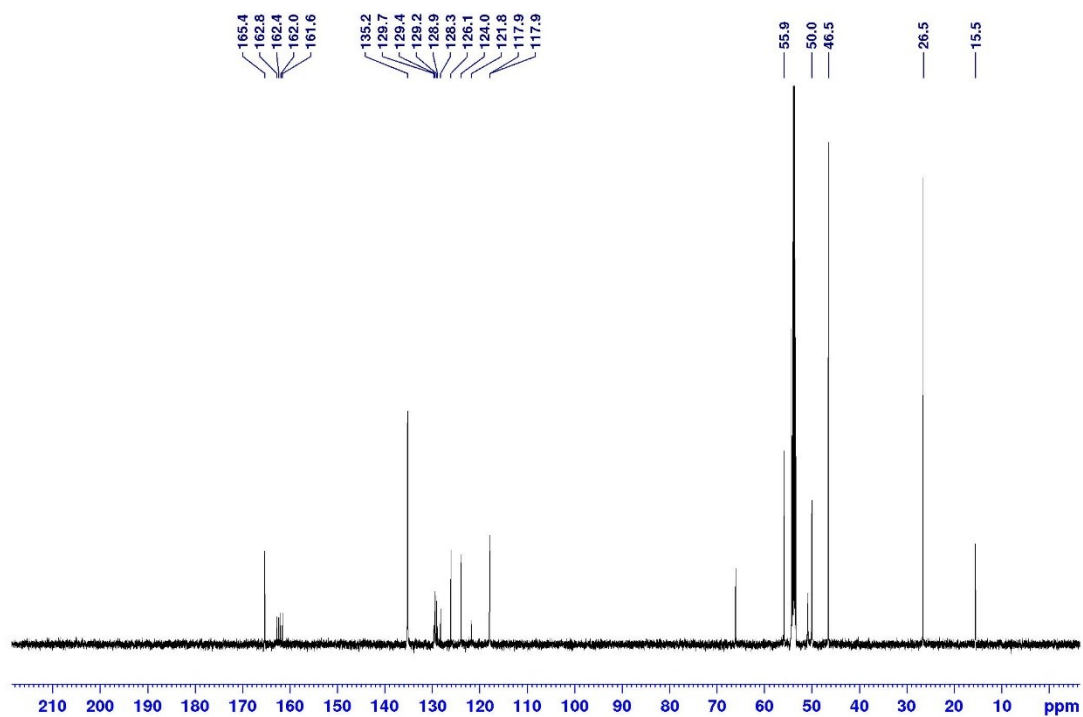

**Figure S18.** <sup>13</sup>C NMR spectrum of **4** recorded in CD<sub>2</sub>Cl<sub>2</sub>.

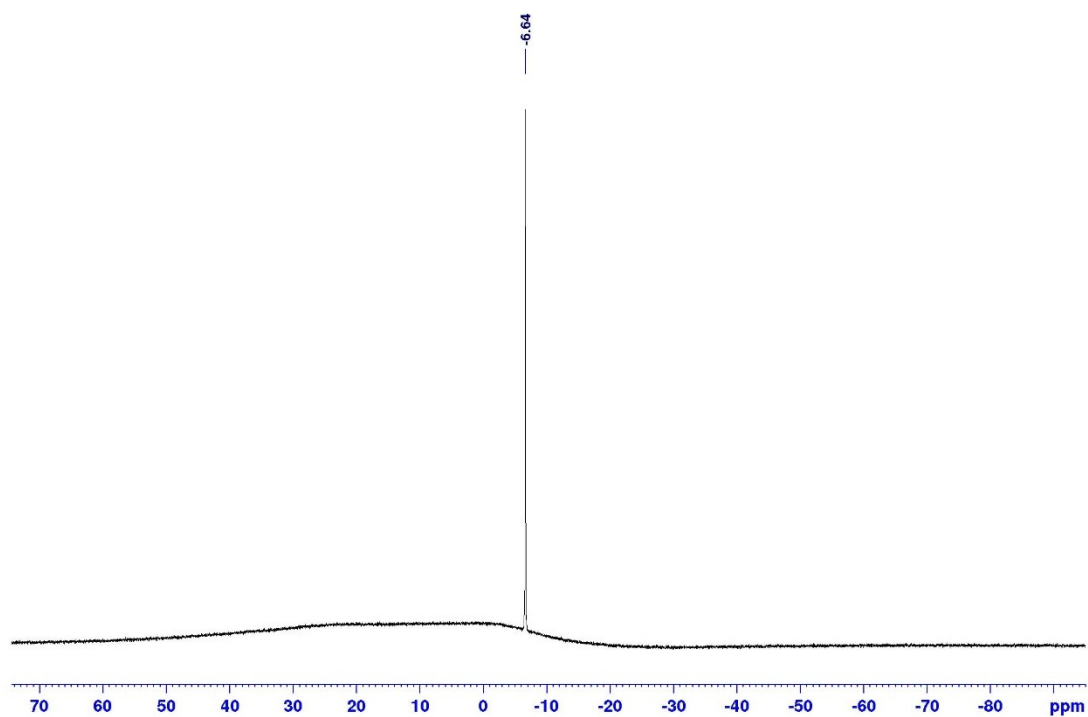

**Figure S19.** <sup>11</sup>B NMR spectrum of **4** recorded in CD<sub>2</sub>Cl<sub>2</sub>.

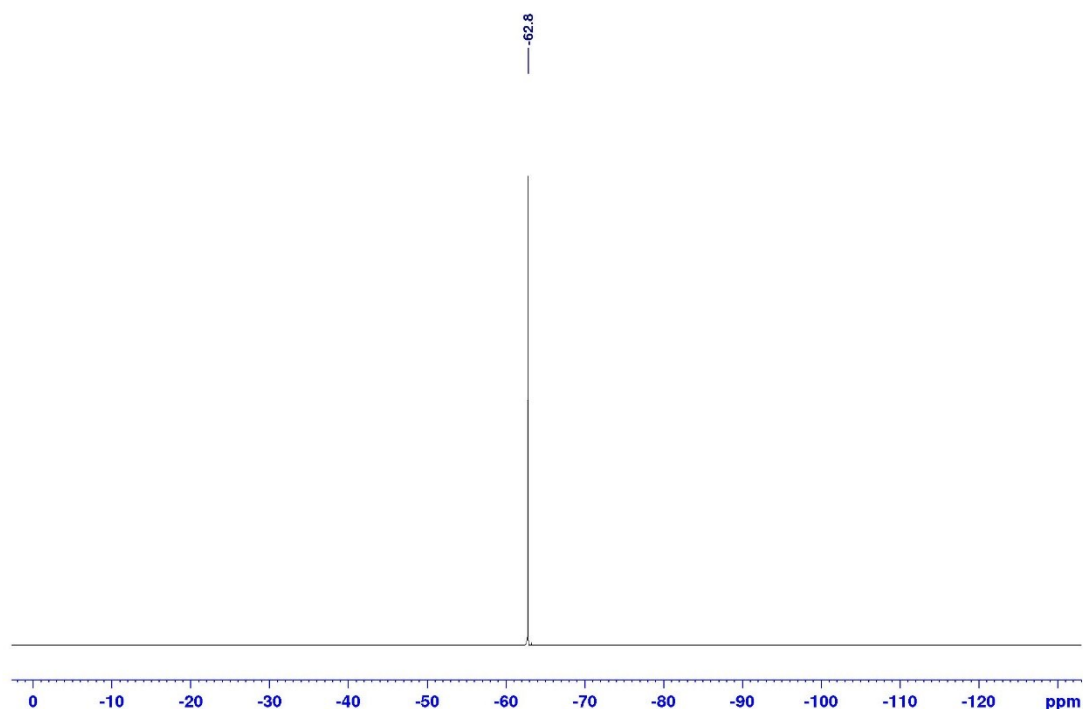

**Figure S20.**  $^{19}\text{F}$  NMR spectrum of **4** recorded in  $\text{CD}_2\text{Cl}_2$ .

#### Compound 5

**2** (0.172 mmol, 0.200 g) was dissolved in THF (5 mL) and treated with benzophenone (0.172 mmol, 0.032 g). The reaction mixture was heated at 45 °C for 6 h followed by the evaporation of volatiles under vacuum ( $10^{-3}$  mbar). A colourless precipitate was formed which was washed once with ether and twice with *n*-hexane and then dried to obtain a colourless powder of **5**. The compound was crystallised from a mixture of THF and *n*-hexane. Yield: 0.207 g (90%); elemental analysis for  $\text{C}_{57}\text{H}_{53}\text{BF}_{24}\text{N}_4\text{OZn}$ : C, 51.01; H, 3.98; N, 4.17; found: C, 50.76; H, 3.83; N, 4.02;  $^1\text{H}$  NMR ( $\text{CD}_2\text{Cl}_2$ , 500 MHz):  $\delta$  2.44 (s, 18H,  $\text{NCH}_3$ ), 2.55 (t, 6H,  $^3J_{\text{H-H}} = 5$  Hz,  $\text{NCH}_2$ ), 2.70 (t, 6H,  $^3J_{\text{H-H}} = 5$  Hz,  $\text{NCH}_2$ ), 5.94 (s, 1H,  $\text{Ph}_2\text{CHO}$ ), 7.11 (t, 2H,  $^3J_{\text{H-H}} = 5$  Hz, *p*- $\text{C}_6\text{H}_5$ ), 7.25 (t, 4H, *m*- $\text{C}_6\text{H}_5$ ), 7.11 (t, 2H,  $^3J_{\text{H-H}} = 5$  Hz, *p*- $\text{C}_6\text{H}_5$ ), 7.51 (d, 4H,  $^3J_{\text{H-H}} = 5$  Hz, *o*- $\text{C}_6\text{H}_3$ ), 7.58 (s, 4H, *p*- $\text{C}_6\text{H}_3$ ), 7.58 (br, 8H, *o*- $\text{C}_6\text{H}_3$ ) (Figure S21);  $^{13}\text{C}\{^1\text{H}\}$  NMR ( $\text{CD}_2\text{Cl}_2$ , 126 MHz):  $\delta$  -1.7 ( $\text{CH}_2\text{Me}$ ), 13.9 ( $\text{CCH}_3$ ), 46.6 ( $\text{NCH}_3$ ), 52.1 ( $\text{NCH}_2$ ), 56.5 ( $\text{NCH}_2$ ), 81.7 (s,  $\text{Ph}_2\text{CHO}$ ), 117.9 (t, *p*-C), 126.1 (q,  $\text{CF}_3$ ), 129.2 (m, *m*-C), 135.2 (s, *o*-C), 162.0 (q, *i*-C), 125.9 (s, *p*- $\text{C}_6\text{H}_5$ ), 126.5 (s, *m*- $\text{C}_6\text{H}_5$ ), 128.6 (s, *o*- $\text{C}_6\text{H}_5$ ) 152.2 (s, *i*- $\text{C}_6\text{H}_5$ ) (Figure S22);  $^{11}\text{B}$  NMR ( $\text{CD}_2\text{Cl}_2$ , 128 MHz):  $\delta$  -6.46 (Figure S23);  $^{19}\text{F}$  NMR ( $\text{CD}_2\text{Cl}_2$ , 471 MHz):  $\delta$  -62.80 (Figure S24).

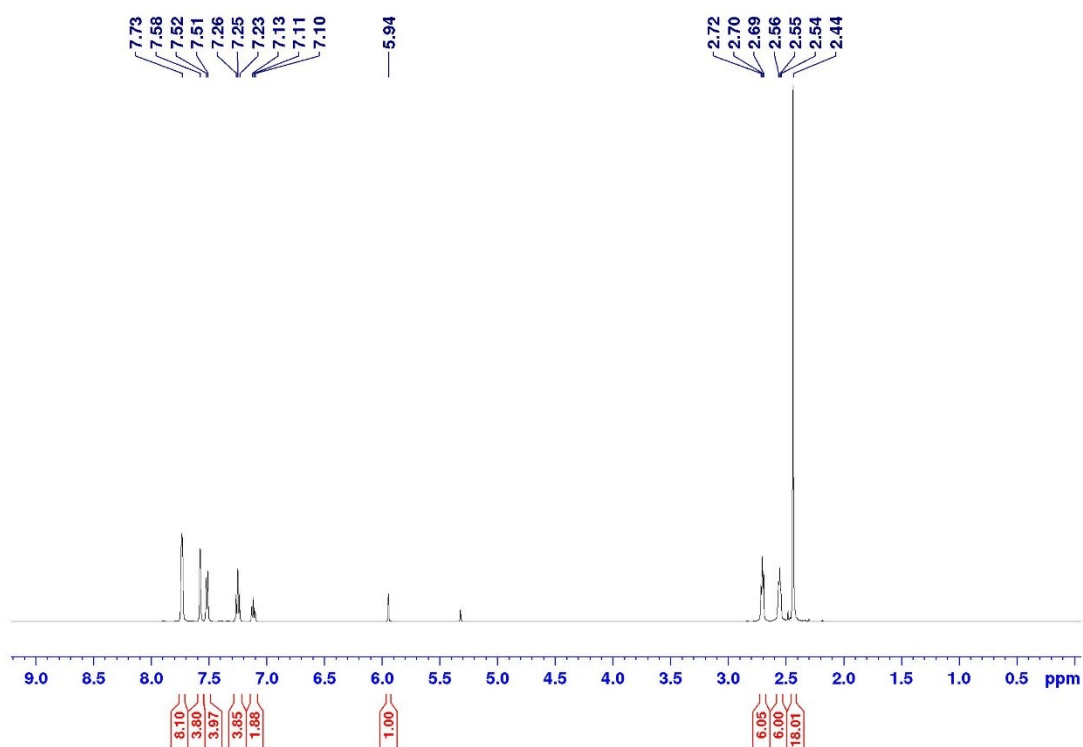

**Figure S21.** <sup>1</sup>H NMR spectrum of **5** recorded in CD<sub>2</sub>Cl<sub>2</sub>.

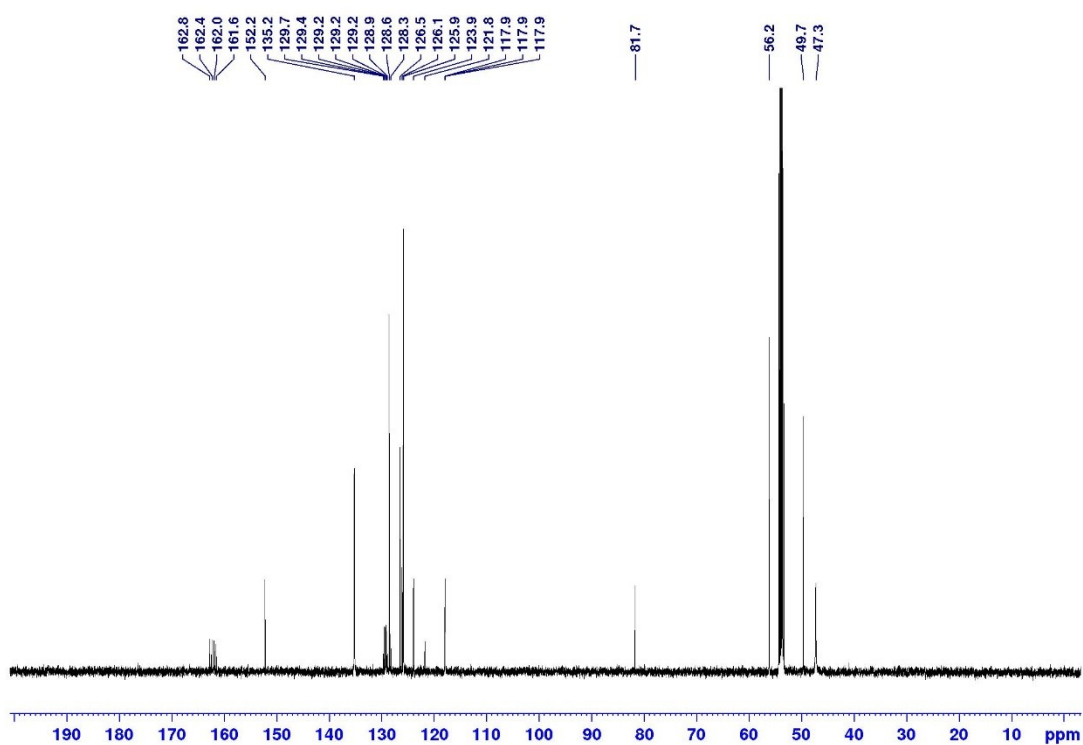

**Figure S22.** <sup>13</sup>C NMR spectrum of **5** recorded in CD<sub>2</sub>Cl<sub>2</sub>.

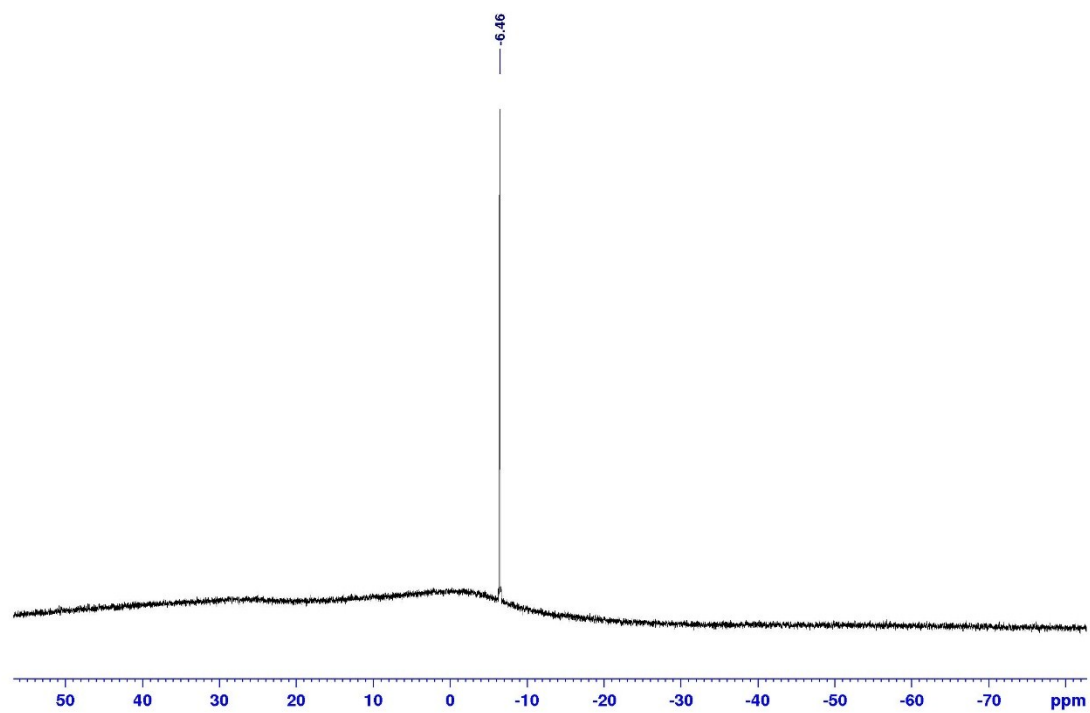

**Figure S23.**  $^{11}\text{B}$  NMR spectrum of **5** recorded in  $\text{CD}_2\text{Cl}_2$ .

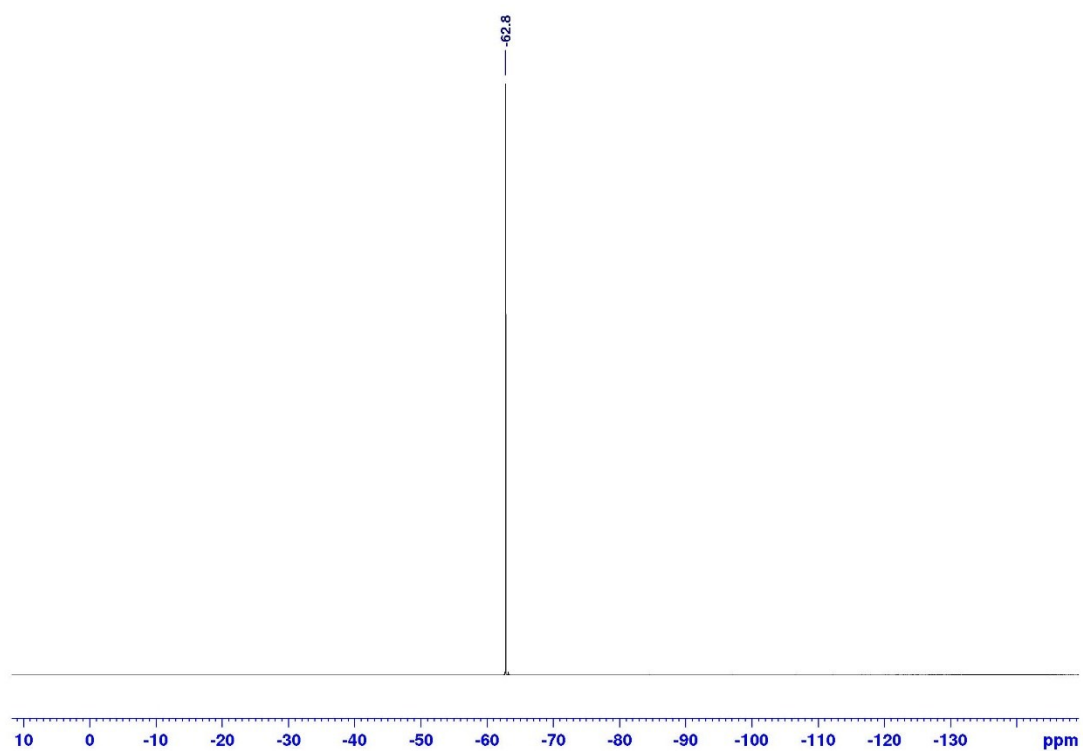

**Figure S24.**  $^{19}\text{F}$  NMR spectrum of **5** recorded in  $\text{CD}_2\text{Cl}_2$ .

### Catalytic hydrosilylation of CO<sub>2</sub>

An NMR tube equipped with a Young valve was charged with 0.0165 mmol of **2** (0.0195 g), and 0.0165 mmol of BPh<sub>3</sub> (0.0039 g). Acetonitrile[D<sub>3</sub>] (0.500 mL) was added to this mixture followed by 0.324 mmol of PhSiH<sub>3</sub> (0.040 mL). The reaction mixture was degassed thrice and a constant pressure of CO<sub>2</sub> (1.5 bar) was maintained at 50 °C. The progress of the reaction was monitored by <sup>1</sup>H NMR spectroscopy and the complete consumption of PhSiH<sub>3</sub> (98% in 2h) was observed. TOF 29.1 h<sup>-1</sup>

### Catalytic hydrosilylation of Ph<sub>2</sub>CO

An NMR tube equipped with a Young valve was charged with 0.0044 mmol of **2** (0.005 g), and 0.088 mmol of Ph<sub>2</sub>CO (0.016 g). Acetonitrile[D<sub>3</sub>] (0.500 mL) was added to this mixture followed by 0.029 mmol of PhSiH<sub>3</sub> (0.0036 mL). The NMR tube was heated at 60 °C and the reaction was monitored by <sup>1</sup>H NMR Spectroscopy for complete consumption of PhSiH<sub>3</sub> to form PhSi(OCHPh<sub>2</sub>)<sub>3</sub> (6 h).

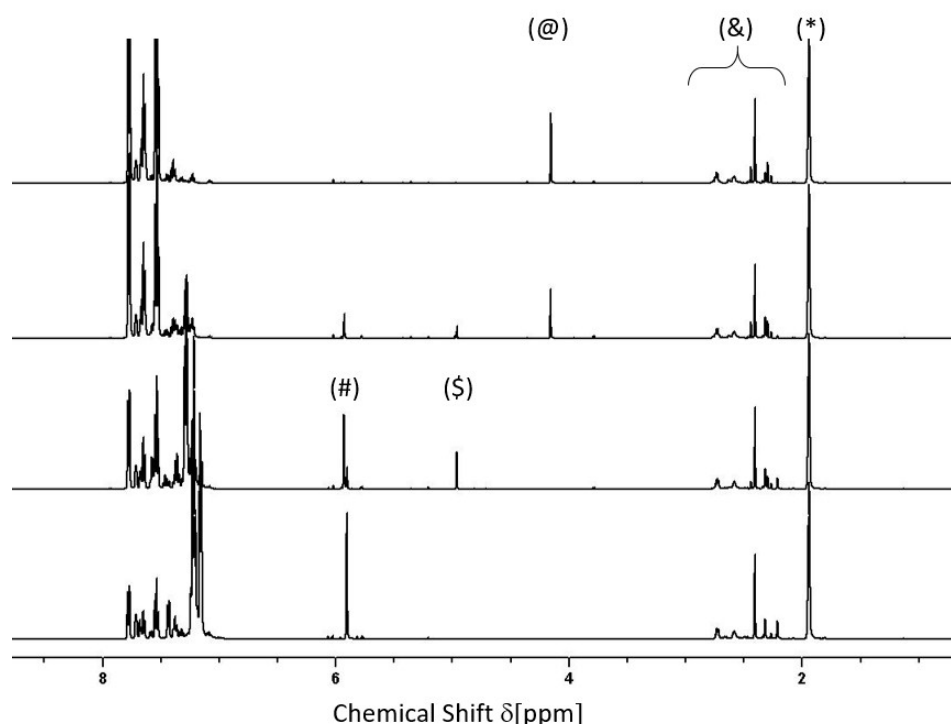

**Figure S25.** <sup>1</sup>H NMR spectra (stacked) of catalytic reduction of Ph<sub>2</sub>CO during the course of reaction in acetonitrile-D<sub>3</sub>. ‘(\*)’ denotes CD<sub>3</sub>CN; ‘(&)’ denotes Me<sub>6</sub>tren; ‘(@)’ denotes PhSiH<sub>3</sub>; ‘(\$)’ denotes PhSiH<sub>2</sub>OCHPh<sub>2</sub>; ‘(#)’ denotes PhSi(OCHPh<sub>2</sub>)<sub>3</sub>.

## 2. Crystallographic Data

Single-crystal X-ray crystallography for structural analysis was performed with a Bruker Kappa Apex-II CCD diffractometer at 298 K and with Mo-K $\alpha$  irradiation ( $\lambda = 0.71073$  Å). The structures were solved by direct methods with SIR-92, SHELXS-97 or SHELX-2013. Crystallographic data, details of data collection and structure refinement parameters for compounds **1-6** are presented below:

Table S1. Crystal data and structure refinement for (**1**).

|                                   |                                                                     |                               |
|-----------------------------------|---------------------------------------------------------------------|-------------------------------|
| Identification code               | Compound 1                                                          |                               |
| CCDC                              | 1878262                                                             |                               |
| Empirical formula                 | C <sub>46</sub> H <sub>47</sub> B F <sub>24</sub> N <sub>4</sub> Zn |                               |
| Formula weight                    | 1188.05                                                             |                               |
| Temperature                       | 150(2) K                                                            |                               |
| Wavelength                        | 0.71073 Å                                                           |                               |
| Crystal system                    | Monoclinic                                                          |                               |
| Space group                       | P 21/c                                                              |                               |
| Unit cell dimensions              | a = 12.6025(3) Å                                                    | $\alpha = 90^\circ$ .         |
|                                   | b = 17.6868(4) Å                                                    | $\beta = 93.6760(10)^\circ$ . |
|                                   | c = 22.9841(5) Å                                                    | $\gamma = 90^\circ$ .         |
| Volume                            | 5112.6(2) Å <sup>3</sup>                                            |                               |
| Z                                 | 4                                                                   |                               |
| Density (calculated)              | 1.543 Mg/m <sup>3</sup>                                             |                               |
| Absorption coefficient            | 0.606 mm <sup>-1</sup>                                              |                               |
| F(000)                            | 2408                                                                |                               |
| Crystal size                      | 0.200 x 0.180 x 0.150 mm <sup>3</sup>                               |                               |
| Theta range for data collection   | 1.454 to 24.999°.                                                   |                               |
| Index ranges                      | -14 ≤ h ≤ 14, -21 ≤ k ≤ 21, -27 ≤ l ≤ 26                            |                               |
| Reflections collected             | 38629                                                               |                               |
| Independent reflections           | 8977 [R(int) = 0.0378]                                              |                               |
| Completeness to theta = 24.999°   | 99.8 %                                                              |                               |
| Absorption correction             | Semi-empirical from equivalents                                     |                               |
| Max. and min. transmission        | 0.915 and 0.888                                                     |                               |
| Refinement method                 | Full-matrix least-squares on F <sup>2</sup>                         |                               |
| Data / restraints / parameters    | 8977 / 199 / 809                                                    |                               |
| Goodness-of-fit on F <sup>2</sup> | 1.024                                                               |                               |
| Final R indices [I > 2σ(I)]       | R1 = 0.0609, wR2 = 0.1562                                           |                               |
| R indices (all data)              | R1 = 0.0796, wR2 = 0.1721                                           |                               |
| Extinction coefficient            | n/a                                                                 |                               |
| Largest diff. peak and hole       | 0.807 and -0.841 e.Å <sup>-3</sup>                                  |                               |

Table S2. Crystal data and structure refinement for **(2)**

|                                   |                                             |                              |  |
|-----------------------------------|---------------------------------------------|------------------------------|--|
| Identification code               | compound 2                                  |                              |  |
| CCDC                              | 1878263                                     |                              |  |
| Empirical formula                 | C44 H43 B F24 N4 Zn                         |                              |  |
| Formula weight                    | 1160.00                                     |                              |  |
| Temperature                       | 150(2) K                                    |                              |  |
| Wavelength                        | 0.71073 Å                                   |                              |  |
| Crystal system                    | Triclinic                                   |                              |  |
| Space group                       | P -1                                        |                              |  |
| Unit cell dimensions              | a = 12.1404(11) Å                           | $\alpha = 95.682(3)^\circ$ . |  |
|                                   | b = 12.1678(11) Å                           | $\beta = 103.794(3)^\circ$ . |  |
|                                   | c = 17.0313(16) Å                           | $\gamma = 95.983(3)^\circ$ . |  |
| Volume                            | 2410.0(4) Å <sup>3</sup>                    |                              |  |
| Z                                 | 2                                           |                              |  |
| Density (calculated)              | 1.599 Mg/m <sup>3</sup>                     |                              |  |
| Absorption coefficient            | 0.640 mm <sup>-1</sup>                      |                              |  |
| F(000)                            | 1172                                        |                              |  |
| Crystal size                      | 0.150 x 0.120 x 0.080 mm <sup>3</sup>       |                              |  |
| Theta range for data collection   | 2.266 to 24.999°.                           |                              |  |
| Index ranges                      | -14<=h<=14, -14<=k<=14, -20<=l<=20          |                              |  |
| Reflections collected             | 54478                                       |                              |  |
| Independent reflections           | 8492 [R(int) = 0.0516]                      |                              |  |
| Completeness to theta = 24.999°   | 99.9 %                                      |                              |  |
| Absorption correction             | Semi-empirical from equivalents             |                              |  |
| Max. and min. transmission        | 0.950 and 0.911                             |                              |  |
| Refinement method                 | Full-matrix least-squares on F <sup>2</sup> |                              |  |
| Data / restraints / parameters    | 8492 / 6 / 677                              |                              |  |
| Goodness-of-fit on F <sup>2</sup> | 1.023                                       |                              |  |
| Final R indices [I>2sigma(I)]     | R1 = 0.0366, wR2 = 0.0833                   |                              |  |
| R indices (all data)              | R1 = 0.0499, wR2 = 0.0905                   |                              |  |
| Extinction coefficient            | n/a                                         |                              |  |
| Largest diff. peak and hole       | 0.615 and -0.448 e.Å <sup>-3</sup>          |                              |  |

Table S3. Crystal data and structure refinement for **(3)**.

|                                   |                                                                                    |                            |
|-----------------------------------|------------------------------------------------------------------------------------|----------------------------|
| Identification code               | compound 3                                                                         |                            |
| CCDC                              | 1878264                                                                            |                            |
| Empirical formula                 | C <sub>50</sub> H <sub>55</sub> B F <sub>24</sub> N <sub>4</sub> O <sub>2</sub> Zn |                            |
| Formula weight                    | 1276.16                                                                            |                            |
| Temperature                       | 150(2) K                                                                           |                            |
| Wavelength                        | 0.71073 Å                                                                          |                            |
| Crystal system                    | Monoclinic                                                                         |                            |
| Space group                       | P 21/n                                                                             |                            |
| Unit cell dimensions              | a = 16.61(7) Å                                                                     | $\alpha = 90^\circ$ .      |
|                                   | b = 11.92(5) Å                                                                     | $\beta = 90.62(3)^\circ$ . |
|                                   | c = 28.25(13) Å                                                                    | $\gamma = 90^\circ$ .      |
| Volume                            | 5596(42) Å <sup>3</sup>                                                            |                            |
| Z                                 | 4                                                                                  |                            |
| Density (calculated)              | 1.515 Mg/m <sup>3</sup>                                                            |                            |
| Absorption coefficient            | 0.561 mm <sup>-1</sup>                                                             |                            |
| F(000)                            | 2600                                                                               |                            |
| Crystal size                      | 0.240 x 0.120 x 0.050 mm <sup>3</sup>                                              |                            |
| Theta range for data collection   | 0.721 to 24.999°.                                                                  |                            |
| Index ranges                      | -19 ≤ h ≤ 19, -14 ≤ k ≤ 14, -33 ≤ l ≤ 33                                           |                            |
| Reflections collected             | 39481                                                                              |                            |
| Independent reflections           | 9851 [R(int) = 0.1291]                                                             |                            |
| Completeness to theta = 24.999°   | 100.0 %                                                                            |                            |
| Absorption correction             | Semi-empirical from equivalents                                                    |                            |
| Max. and min. transmission        | 0.972 and 0.877                                                                    |                            |
| Refinement method                 | Full-matrix least-squares on F <sup>2</sup>                                        |                            |
| Data / restraints / parameters    | 9851 / 6 / 740                                                                     |                            |
| Goodness-of-fit on F <sup>2</sup> | 1.021                                                                              |                            |
| Final R indices [I > 2σ(I)]       | R1 = 0.0730, wR2 = 0.1647                                                          |                            |
| R indices (all data)              | R1 = 0.1407, wR2 = 0.2035                                                          |                            |
| Extinction coefficient            | n/a                                                                                |                            |
| Largest diff. peak and hole       | 0.676 and -0.648 e.Å <sup>-3</sup>                                                 |                            |

Table S4. Crystal data and structure refinement for **(4)**

|                                   |                                                                     |                               |
|-----------------------------------|---------------------------------------------------------------------|-------------------------------|
| Identification code               | compound 4                                                          |                               |
| CCDC                              | 1878265                                                             |                               |
| Empirical formula                 | C <sub>54</sub> H <sub>62</sub> B F <sub>24</sub> N <sub>6</sub> Zn |                               |
| Formula weight                    | 1327.27                                                             |                               |
| Temperature                       | 150(2) K                                                            |                               |
| Wavelength                        | 0.71073 Å                                                           |                               |
| Crystal system                    | Triclinic                                                           |                               |
| Space group                       | P -1                                                                |                               |
| Unit cell dimensions              | a = 13.312(4) Å                                                     | $\alpha = 99.762(9)^\circ$ .  |
|                                   | b = 14.379(4) Å                                                     | $\beta = 108.306(9)^\circ$ .  |
|                                   | c = 17.415(5) Å                                                     | $\gamma = 102.538(9)^\circ$ . |
| Volume                            | 2985.8(14) Å <sup>3</sup>                                           |                               |
| Z                                 | 2                                                                   |                               |
| Density (calculated)              | 1.476 Mg/m <sup>3</sup>                                             |                               |
| Absorption coefficient            | 0.528 mm <sup>-1</sup>                                              |                               |
| F(000)                            | 1358                                                                |                               |
| Crystal size                      | 0.240 x 0.150 x 0.150 mm <sup>3</sup>                               |                               |
| Theta range for data collection   | 1.683 to 24.999°.                                                   |                               |
| Index ranges                      | -15 ≤ h ≤ 15, -17 ≤ k ≤ 17, -20 ≤ l ≤ 20                            |                               |
| Reflections collected             | 42361                                                               |                               |
| Independent reflections           | 10510 [R(int) = 0.0565]                                             |                               |
| Completeness to theta = 24.999°   | 99.9 %                                                              |                               |
| Absorption correction             | Semi-empirical from equivalents                                     |                               |
| Max. and min. transmission        | 0.925 and 0.884                                                     |                               |
| Refinement method                 | Full-matrix least-squares on F <sup>2</sup>                         |                               |
| Data / restraints / parameters    | 10510 / 148 / 893                                                   |                               |
| Goodness-of-fit on F <sup>2</sup> | 1.036                                                               |                               |
| Final R indices [I > 2σ(I)]       | R1 = 0.0673, wR2 = 0.1685                                           |                               |
| R indices (all data)              | R1 = 0.0888, wR2 = 0.1880                                           |                               |
| Extinction coefficient            | n/a                                                                 |                               |
| Largest diff. peak and hole       | 1.356 and -0.674 e.Å <sup>-3</sup>                                  |                               |

Table S5. Crystal data and structure refinement for **(5)**.

|                                   |                                                                                       |                             |
|-----------------------------------|---------------------------------------------------------------------------------------|-----------------------------|
| Identification code               | compound 5                                                                            |                             |
| CCDC                              | 1878266                                                                               |                             |
| Empirical formula                 | C <sub>58</sub> H <sub>55</sub> B Cl <sub>2</sub> F <sub>24</sub> N <sub>4</sub> O Zn |                             |
| Formula weight                    | 1427.14                                                                               |                             |
| Temperature                       | 150(2) K                                                                              |                             |
| Wavelength                        | 0.71073 Å                                                                             |                             |
| Crystal system                    | Monoclinic                                                                            |                             |
| Space group                       | P 21/c                                                                                |                             |
| Unit cell dimensions              | a = 12.54(3) Å                                                                        | $\alpha = 90^\circ$ .       |
|                                   | b = 19.77(5) Å                                                                        | $\beta = 100.01(5)^\circ$ . |
|                                   | c = 26.08(6) Å                                                                        | $\gamma = 90^\circ$ .       |
| Volume                            | 6369(28) Å <sup>3</sup>                                                               |                             |
| Z                                 | 4                                                                                     |                             |
| Density (calculated)              | 1.488 Mg/m <sup>3</sup>                                                               |                             |
| Absorption coefficient            | 0.582 mm <sup>-1</sup>                                                                |                             |
| F(000)                            | 2896                                                                                  |                             |
| Crystal size                      | 0.150 x 0.150 x 0.080 mm <sup>3</sup>                                                 |                             |
| Theta range for data collection   | 1.586 to 24.999°.                                                                     |                             |
| Index ranges                      | -14 ≤ h ≤ 14, -23 ≤ k ≤ 23, -31 ≤ l ≤ 26                                              |                             |
| Reflections collected             | 61247                                                                                 |                             |
| Independent reflections           | 11193 [R(int) = 0.0629]                                                               |                             |
| Completeness to theta = 24.999°   | 99.9 %                                                                                |                             |
| Absorption correction             | Semi-empirical from equivalents                                                       |                             |
| Max. and min. transmission        | 0.955 and 0.918                                                                       |                             |
| Refinement method                 | Full-matrix least-squares on F <sup>2</sup>                                           |                             |
| Data / restraints / parameters    | 11193 / 0 / 826                                                                       |                             |
| Goodness-of-fit on F <sup>2</sup> | 1.033                                                                                 |                             |
| Final R indices [I > 2σ(I)]       | R1 = 0.0555, wR2 = 0.1233                                                             |                             |
| R indices (all data)              | R1 = 0.0878, wR2 = 0.1416                                                             |                             |
| Extinction coefficient            | n/a                                                                                   |                             |
| Largest diff. peak and hole       | 0.877 and -0.622 e.Å <sup>-3</sup>                                                    |                             |

**References:**

- [1] R. J. Errington, "Advanced practical inorganic and metal organic chemistry" 1997, Blackie academic & professional, London.
- [2] W. F. Armarego, C. L. L. Chai, "Purification of laboratory chemicals" 2013, *Elsevier*, UK
- [3] M. Ciampolini, N. Nardi, *Inorg. Chem.* 1966, 5, 41-44.
- [4] C. Zuccaccia, G. Bellachioma, G. Cardaci, A. Macchioni, *J. Am. Chem. Soc.* 2001, 123, 11020-11028.
